# Supplementary material
Source: ML conference proceedings conference paper supplement (https://openreview.net/forum?id=TDhNb2Q9Xm)
Supplement: supplementary_material [file attachment]

# Understanding Experimental Data by Identifying Symmetries with Deep Learning

Anonymous Author(s)  
 Affiliation  
 Address  
 email

## 1 Supplementary Material

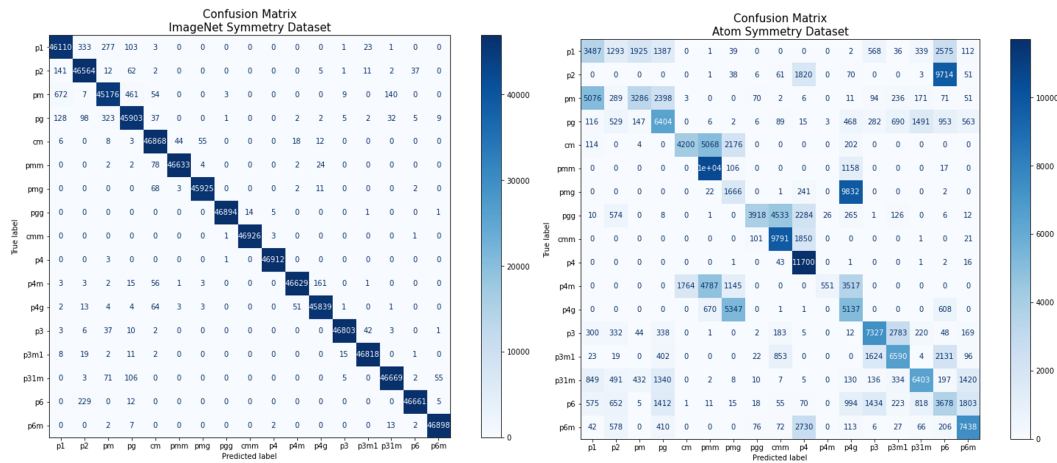

Figure 1: Confusion matrix of train and cross-validation accuracy with ResNet50 model.
